# Supplementary material for: A primary cell wall cellulose-dependent defense mechanism against vascular pathogens revealed by time-resolved dual transcriptomics
Source: PubMed Central journal article supplement (PMC8371875; doi:10.1186/s12915-021-01100-6), 2021-08-17

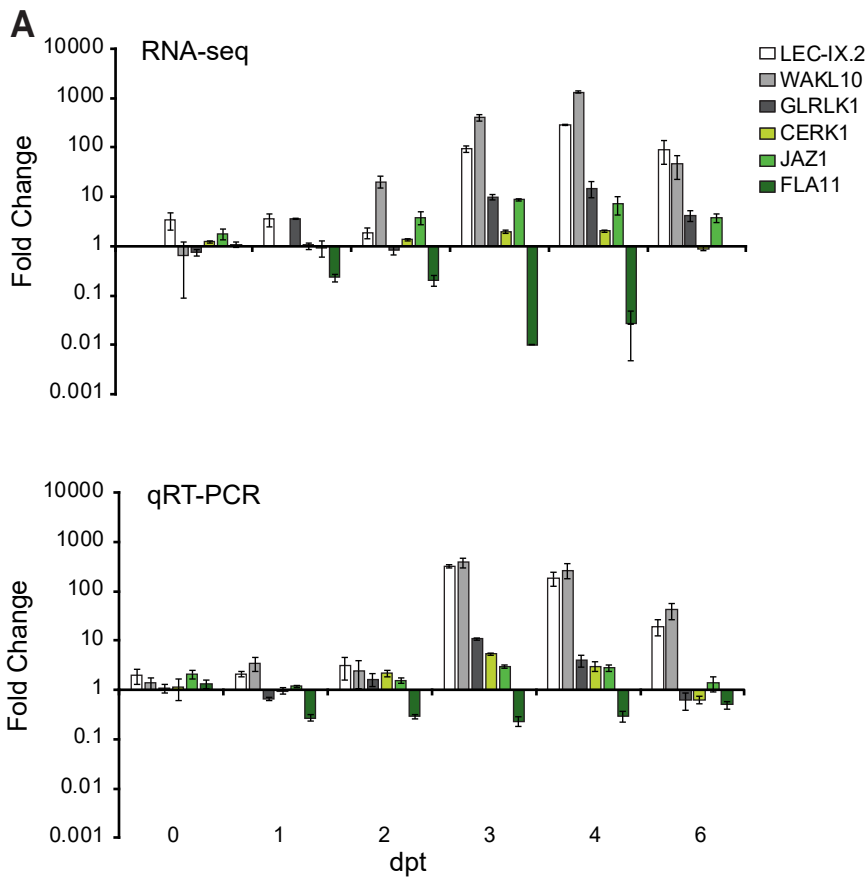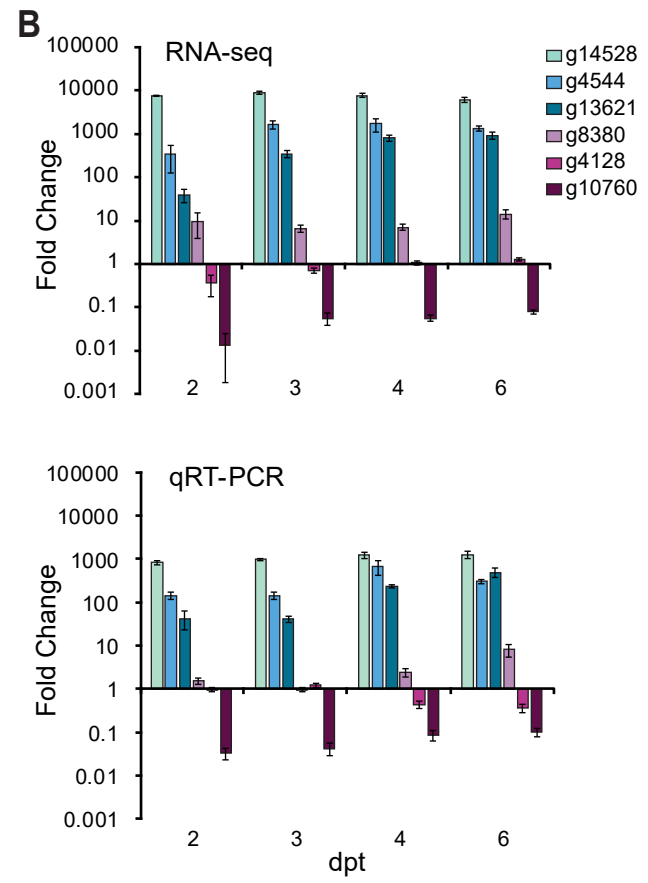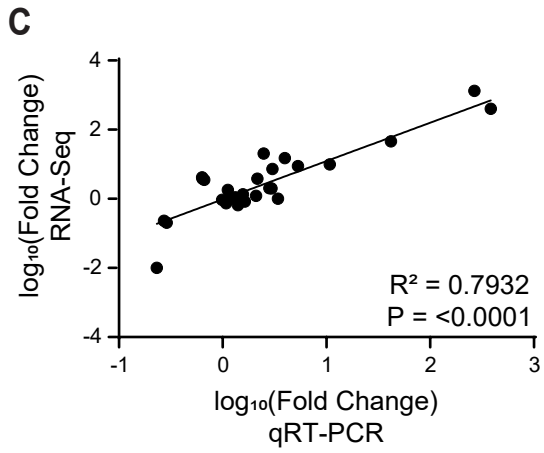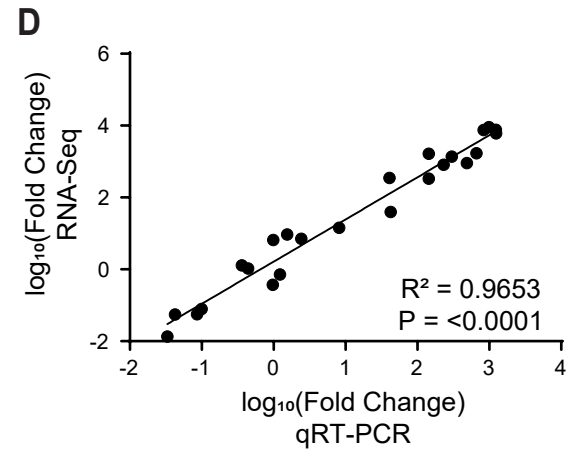

Supplement: 12915_2021_1100_MOESM5_ESM.pdf [file 12915_2021_1100_MOESM5_ESM.pdf]
